# Supplementary material
Source: Research Square preprint supplement (doi:10.21203/rs.3.rs-8512851/v1)
Supplement: Supplementary file 1 [file ff5b8457f489d53eadbfcbcc.docx]

Supplementary Table S1: Baseline characteristics

| **Item** | **Overall (n=43)** | **Notes** |
| --- | --- | --- |
| **Demographics** | | |
| Age (years) | 63.5 ± 10.4 (range: 36-81) | Calculated based on 33 cases with available data. |
| Gender (Male/Female) | 20 / 17 | Based on 37 cases with available data. |
| **Cancer Type Distribution** | | |
| Lung Cancer (various subtypes) | 14 (32.6%) | Includes lung adenocarcinoma (8), small cell lung cancer (2), lung squamous cell carcinoma (1), pulmonary neuroendocrine carcinoma (1), pulmonary atypical carcinoid (1), and lung mucinous adenocarcinoma (1). |
| Colorectal Cancer | 10 (23.3%) | Includes colon adenocarcinoma (4), rectal adenocarcinoma (5), and sigmoid colon cancer (1). |
| Breast Cancer | 5 (11.6%) |  |
| Gastric/Esophageal Cancer | 4 (9.3%) | Includes gastric adenocarcinoma (2), esophagogastric junction adenocarcinoma (1), and esophageal carcinoma (1). |
| Pancreatic Cancer | 3 (7.0%) |  |
| Ovarian Cancer | 2 (4.7%) |  |
| Other Cancers | 5 (11.6%) | Includes one case each of cholangiocarcinoma, small intestine adenocarcinoma, hypopharyngeal squamous cell carcinoma, follicular lymphoma of the breast, and necrotizing myositis. |
| **Treatment Type** | | |
| Chemotherapy alone | 29 (67.4%) |  |
| Chemotherapy combined with immunotherapy | 6 (14.0%) |  |
| Targeted therapy | 4 (9.3%) |  |
| Chemotherapy combined with targeted therapy | 2 (4.7%) |  |
| Chemotherapy followed by radiotherapy | 2 (4.7%) |  |
| **Platelet Elevation Regim** | | |
| TCM treatment alone | 35 (81.4%) |  |
| TCM + Western medicine combination | 8 (18.6%) | Includes TPO, hetrombopag, Shenxuebaojiaonang (a Chinese proprietary medicine for raising platelets), etc. |

Supplementary Table S2: Candidate Active Compounds Screened from the Songhe Guxue Formula

| **Herb**  **(Latin Name)** | **Compound ID** | **Compound Name (MoleculeName)** | **Molecular Formula** | **Molecular Weight**  **(MW)** | **Oral Bioavailability OB (%)** | **Drug-Likeness**  **(DL)** | **Data Source** |
| --- | --- | --- | --- | --- | --- | --- | --- |
| **Rhizoma Atractylodis Macrocephalae** | MOL000033 | [(2R,5S)-5-propan-2-yloctan-2-yl]-...-phenanthren-3-ol | C30H52O | 428.82 | 36.23 | 0.78 | TCMSP |
| **Rhizoma Atractylodis Macrocephalae** | MOL000028 | α-Amyrin | C30H50O | 426.80 | 39.51 | 0.76 | TCMSP |
| **Rhizoma Atractylodis Macrocephalae** | MOL000021 | 14-acetyl-12-senecioyl-2E,8E,10E-atractylentriol | C20H30O5 | 355.44 | 60.31 | 0.31 | TCMSP |
| **Rhizoma Atractylodis Macrocephalae** | MOL000022 | 14-acetyl-12-senecioyl-2E,8Z,10E-atractylentriol | C20H30O5 | 356.45 | 63.37 | 0.30 | TCMSP |
| **Rhizoma Atractylodis Macrocephalae** | MOL000020 | 12-senecioyl-2E,8E,10E-atractylentriol | C18H26O4 | 312.39 | 62.40 | 0.22 | TCMSP |
| **Rhizoma Atractylodis Macrocephalae** | MOL000049 | 3β-acetoxyatractylone | C17H26O3 | 274.39 | 54.07 | 0.22 | TCMSP |
| **Rhizoma Atractylodis Macrocephalae** | MOL000072 | 8β-ethoxy atractylenolide Ⅲ | C17H28O3 | 276.41 | 35.95 | 0.21 | TCMSP |
| **Caulis Spatholobi** | MOL000296 | hederagenin | C30H48O4 | 414.79 | 36.91 | 0.75 | TCMSP |
| **Caulis Spatholobi** | MOL000033 | (Same as MOL000033 in Rhizoma Atractylodis Macrocephalae) | C30H52O | 428.82 | 36.23 | 0.78 | TCMSP |
| **Caulis Spatholobi** | MOL000358 | beta-sitosterol | C29H50O | 414.79 | 36.91 | 0.75 | TCMSP |
| **Caulis Spatholobi** | MOL000392 | formononetin | C16H12O4 | 268.28 | 69.67 | 0.21 | TCMSP |
| **Caulis Spatholobi** | MOL000417 | Calycosin | C16H12O5 | 284.28 | 47.75 | 0.24 | TCMSP |
| **Caulis Spatholobi** | MOL000449 | Stigmasterol | C29H48O | 412.77 | 43.83 | 0.76 | TCMSP |
| **Caulis Spatholobi** | MOL000461 | 3,7-dihydroxy-6-methoxy-dihydroflavonol | C16H14O7 | 302.30 | 43.80 | 0.26 | TCMSP |
| **Caulis Spatholobi** | MOL000468 | 8-o-Methylreyusi | C17H16O5 | 298.31 | 70.32 | 0.27 | TCMSP |
| **Caulis Spatholobi** | MOL000469 | 3-Hydroxystigmast-5-en-7-one | C29H48O2 | 428.77 | 40.93 | 0.78 | TCMSP |
| **Caulis Spatholobi** | MOL000470 | 8-C-α-L-arabinosylluteolin | C20H18O10 | 418.38 | 35.54 | 0.66 | TCMSP |
| **Caulis Spatholobi** | MOL000471 | aloe-emodin | C15H10O5 | 270.25 | 83.38 | 0.24 | TCMSP |
| **Caulis Spatholobi** | MOL000483 | (Z)-3-(4-hydroxy-3-methoxy-phenyl)-N-[2-(4-hydroxyphenyl)ethyl]acrylamide | C18H19NO4 | 313.38 | 118.35* | 0.26 | TCMSP |
| **Caulis Spatholobi** | MOL000490 | petunidin | C16H13O7+ | 317.29 | 30.05 | 0.31 | TCMSP |
| **Caulis Spatholobi** | MOL000491 | Augelicin | C24H22N2O4 | 426.50 | 37.50 | 0.66 | TCMSP |
| **Caulis Spatholobi** | MOL000492 | (+)-catechin | C15H14O6 | 290.29 | 54.83 | 0.24 | TCMSP |
| **Caulis Spatholobi** | MOL000493 | campesterol | C28H48O | 400.76 | 37.58 | 0.71 | TCMSP |
| **Caulis Spatholobi** | MOL000497 | licochalcone a | C21H22O4 | 338.43 | 40.79 | 0.29 | TCMSP |
| **Caulis Spatholobi** | MOL000500 | Vestitol | C16H16O4 | 272.32 | 74.66 | 0.21 | TCMSP |
| **Caulis Spatholobi** | MOL000501 | Consume close grain | C16H14O6 | 302.30 | 68.12 | 0.27 | TCMSP |
| **Caulis Spatholobi** | MOL000502 | Cajinin | C16H12O6 | 300.28 | 68.80 | 0.27 | TCMSP |
| **Caulis Spatholobi** | MOL000503 | Medicagol | C16H8O6 | 296.24 | 57.49 | 0.60 | TCMSP |
| **Caulis Spatholobi** | MOL000506 | Lupinidine | C15H27NO | 234.43 | 61.89 | 0.21 | TCMSP |
| **Caulis Spatholobi** | MOL000507 | Psi-Baptigenin | C16H10O5 | 282.26 | 70.12 | 0.31 | TCMSP |
| **Herba Agrimoniae** | MOL001002 | ellagic acid | C14H6O8 | 302.20 | 43.06 | 0.43 | TCMSP |
| **Herba Agrimoniae** | MOL000422 | kaempferol | C15H10O6 | 286.25 | 41.88 | 0.24 | TCMSP |
| **Herba Agrimoniae** | MOL000492 | (+)-catechin | C15H14O6 | 290.29 | 54.83 | 0.24 | TCMSP |
| **Herba Agrimoniae** | MOL000006 | luteolin | C15H10O6 | 286.25 | 36.16 | 0.25 | TCMSP |
| **Herba Agrimoniae** | MOL000098 | quercetin | C15H10O7 | 302.25 | 46.43 | 0.28 | TCMSP |
| **Herba Leonuri** | MOL001418 | galeopsin | C22H24O6 | 376.54 | 61.02 | 0.38 | TCMSP |
| **Herba Leonuri** | MOL001420 | ZINC04073977 | C29H52O | 412.77 | 38.00 | 0.76 | TCMSP |
| **Herba Leonuri** | MOL001421 | preleoheterin | C20H26O4 | 334.50 | 85.97 | 0.33 | TCMSP |
| **Herba Leonuri** | MOL001422 | iso-preleoheterin | C20H26O4 | 334.50 | 66.29 | 0.33 | TCMSP |
| **Herba Leonuri** | MOL000098 | quercetin | C15H10O7 | 302.25 | 46.43 | 0.28 | TCMSP |
| **Herba Leonuri** | MOL001439 | arachidonic acid | C20H32O2 | 304.52 | 45.57 | 0.20 | TCMSP |
| **Herba Leonuri** | MOL000354 | isorhamnetin | C16H12O7 | 316.28 | 49.60 | 0.31 | TCMSP |
| **Herba Leonuri** | MOL000422 | kaempferol | C15H10O6 | 286.25 | 41.88 | 0.24 | TCMSP |
| **Lignum Pini Nodi** | MOL002039 | Isopimaric acid | C20H30O2 | 302.50 | 36.20 | 0.28 | TCMSP |
| **Colla Corii Asini** | EJ1 (cid:5962) | Lysine | C6H14N2O2 | 146.19 | - | - | HERB/PubChem |
| **Colla Corii Asini** | EJ2 (cid:6322) | Arginine | C6H14N4O2 | 174.20 | - | - | HERB/PubChem |
| **Cornu Cervi Degelatinatum** | LJS1 (cid:10112) | Calcium Carbonate | CCaO3 | 100.09 | - | - | HERB/PubChem |
| **Cornu Cervi Degelatinatum** | LJS2 (cid:24456) | Tricalcium Phosphate | Ca3O8P2 | 310.18 | - |  |  |

### Supplementary Table S3. Common Targets of Songhe Guxue Formula and CTIT

| **No.** | **Target Gene Symbol** | **Target Gene Name (Full Name)** | **Primary Associated Function / Pathway Category** |
| --- | --- | --- | --- |
| 1 | FLT3 | Fms Related Receptor Tyrosine Kinase 3 | Tyrosine kinase receptor, hematopoiesis, cell proliferation |
| 2 | GSK3B | Glycogen Synthase Kinase 3 Beta | PI3K-Akt pathway, Wnt pathway, glucose |
| 3 | PARP1 | Poly(ADP-Ribose) Polymerase 1 | DNA repair, apoptosis |
| 4 | MMP9 | Matrix Metallopeptidase 9 | Extracellular matrix degradation, inflammation |
| 5 | MMP2 | Matrix Metallopeptidase 2 | Extracellular matrix degradation, angiogenesis |
| 6 | ABCG2 | ATP Binding Cassette Subfamily G Member 2 | Drug efflux pump, multidrug resistance |
| 7 | TOP1 | DNA Topoisomerase I | DNA replication & transcription, chemotherapy target |
| 8 | ARG1 | Arginase 1 | Arginine metabolism, immunoregulation |
| 9 | ABCC1 | ATP Binding Cassette Subfamily C Member 1 | Drug efflux pump, multidrug resistance |
| 10 | ABCB1 | ATP Binding Cassette Subfamily B Member 1 | Drug efflux pump (P-gp), multidrug resistance |
| 11 | CYP19A1 | Cytochrome P450 Family 19 Subfamily A Member 1 | Estrogen biosynthesis, steroid metabolism |
| 12 | ESR1 | Estrogen Receptor 1 | Nuclear receptor, hormone signaling, cell proliferation |
| 13 | PTGS2 | Prostaglandin-Endoperoxide Synthase 2 | Inflammation, prostaglandin synthesis |
| 14 | CFTR | CF Transmembrane Conductance Regulator | Ion channel, chloride transport |
| 15 | TERT | Telomerase Reverse Transcriptase | Telomere maintenance, cell senescence |
| 16 | IGF1R | Insulin Like Growth Factor 1 Receptor | Tyrosine kinase receptor, growth factor signaling |
| 17 | EGFR | Epidermal Growth Factor Receptor | Tyrosine kinase receptor, cell proliferation |
| 18 | F2 | Coagulation Factor II | Blood coagulation, thrombin activity |
| 19 | MPO | Myeloperoxidase | Oxidative burst, antimicrobial defense |
| 20 | SRC | SRC Proto-Oncogene, Non-Receptor Tyrosine Kinase | Tyrosine kinase, signal transduction |
| 21 | KDR | Kinase Insert Domain Receptor | VEGF receptor, angiogenesis |
| 22 | MMP3 | Matrix Metallopeptidase 3 | Extracellular matrix degradation |
| 23 | MET | MET Proto-Oncogene, Receptor Tyrosine Kinase | Tyrosine kinase receptor, cell motility |
| 24 | AKT1 | AKT Serine/Threonine Kinase 1 | PI3K-Akt pathway, cell survival |
| 25 | AR | Androgen Receptor | Nuclear receptor, steroid hormone signaling |
| 26 | CYP2C19 | Cytochrome P450 Family 2 Subfamily C Member 19 | Drug metabolism |
| 27 | NR1H2 | Nuclear Receptor Subfamily 1 Group H Member 2 | Nuclear receptor, cholesterol metabolism |
| 28 | NOS2 | Nitric Oxide Synthase 2 | Nitric oxide production, inflammation |
| 29 | PPARG | Peroxisome Proliferator Activated Receptor Gamma | Nuclear receptor, adipogenesis |
| 30 | PTPN11 | Protein Tyrosine Phosphatase Non-Receptor Type 11 | Signal transduction, RAS/MAPK pathway |
| 31 | NR3C1 | Nuclear Receptor Subfamily 3 Group C Member 1 | Glucocorticoid receptor, stress response |
| 32 | TOP2A | DNA Topoisomerase II Alpha | DNA replication, chemotherapy target |
| 33 | IL6 | Interleukin 6 | Cytokine, inflammation, JAK-STAT pathway |
| 34 | IL2 | Interleukin 2 | Cytokine, immune response |
| 35 | ALDH2 | Aldehyde Dehydrogenase 2 Family Member | Alcohol metabolism, detoxification |
| 36 | CBR1 | Carbonyl Reductase 1 | Xenobiotic metabolism |
| 37 | MIF | Macrophage Migration Inhibitory Factor | Cytokine, inflammation |
| 38 | PON1 | Paraoxonase 1 | Lipid metabolism, antioxidant |
| 39 | FEN1 | Flap Structure-Specific Endonuclease 1 | DNA replication and repair |
| 40 | IDO1 | Indoleamine 2,3-Dioxygenase 1 | Tryptophan metabolism, immune tolerance |
| 41 | TNF | Tumor Necrosis Factor | Cytokine, inflammation, apoptosis |
| 42 | MAPK3 | Mitogen-Activated Protein Kinase 3 | MAPK signaling, cell proliferation |
| 43 | XIAP | X-Linked Inhibitor Of Apoptosis | Apoptosis inhibitor |
| 44 | MDM2 | MDM2 Proto-Oncogene | p53 regulator, cell cycle |
| 45 | PIK3CG | Phosphatidylinositol-4,5-Bisphosphate 3-Kinase Catalytic Subunit Gamma | PI3K-Akt pathway, immune response |
| 46 | PLA2G2A | Phospholipase A2 Group IIA | Lipid metabolism, inflammation |
| 47 | F3 | Coagulation Factor III (Tissue Factor) | Blood coagulation initiation |
| 48 | CTSD | Cathepsin D | Lysosomal protease, protein degradation |
| 49 | HDAC6 | Histone Deacetylase 6 | Epigenetic regulation, microtubule function |
| 50 | RPS6KB1 | Ribosomal Protein S6 Kinase B1 | mTOR signaling, protein synthesis |
| 51 | MAPK14 | Mitogen-Activated Protein Kinase 14 | p38 MAPK signaling, stress response |
| 52 | BRAF | B-Raf Proto-Oncogene, Serine/Threonine Kinase | MAPK signaling, cell growth |
| 53 | ERN1 | Endoplasmic Reticulum To Nucleus Signaling 1 | ER stress response, unfolded protein response |
| 54 | HDAC4 | Histone Deacetylase 4 | Epigenetic regulation, gene expression |
| 55 | JAK2 | Janus Kinase 2 | JAK-STAT pathway, cytokine signaling |
| 56 | MMP1 | Matrix Metallopeptidase 1 | Extracellular matrix degradation |
| 57 | MAPK1 | Mitogen-Activated Protein Kinase 1 | MAPK signaling, cell proliferation |
| 58 | TGFBR1 | Transforming Growth Factor Beta Receptor 1 | TGF-beta signaling, cell growth inhibition |
| 59 | CHEK1 | Checkpoint Kinase 1 | DNA damage response, cell cycle checkpoint |
| 60 | HTT | Huntingtin | Protein trafficking, neuronal function |
| 61 | CASP3 | Caspase 3 | Apoptosis execution |
| 62 | CDK4 | Cyclin Dependent Kinase 4 | Cell cycle G1/S transition |
| 63 | HSP90AA1 | Heat Shock Protein 90 Alpha Family Class A Member 1 | Protein folding, client protein stability |
| 64 | MTOR | Mechanistic Target Of Rapamycin Kinase | mTOR signaling, cell growth and metabolism |
| 65 | PIK3CA | Phosphatidylinositol-4,5-Bisphosphate 3-Kinase Catalytic Subunit Alpha | PI3K-Akt pathway, cell survival |
| 66 | ABL1 | ABL Proto-Oncogene 1, Non-Receptor Tyrosine Kinase | Tyrosine kinase, cell proliferation |
| 67 | AURKA | Aurora Kinase A | Mitosis, cell cycle regulation |
| 68 | GSTP1 | Glutathione S-Transferase Pi 1 | Detoxification, antioxidant defense |
| 69 | JAK3 | Janus Kinase 3 | JAK-STAT pathway, immune cell signaling |
| 70 | PRKDC | Protein Kinase, DNA-Activated, Catalytic Subunit | DNA damage repair, V(D)J recombination |
| 71 | DRD2 | Dopamine Receptor D2 | Neurotransmitter receptor, G protein-coupled |
| 72 | CYP2D6 | Cytochrome P450 Family 2 Subfamily D Member 6 | Drug metabolism |
| 73 | CHRNA3 | Cholinergic Receptor Nicotinic Alpha 3 Subunit | Neurotransmission, ion channel |
| 74 | ERBB2 | Erb-B2 Receptor Tyrosine Kinase 2 | Tyrosine kinase receptor, cell proliferation |
| 75 | CCND1 | Cyclin D1 | Cell cycle G1/S transition |
| 76 | MAP3K8 | Mitogen-Activated Protein Kinase Kinase Kinase 8 | MAPK signaling, inflammation |
| 77 | EPHB4 | EPH Receptor B4 | Tyrosine kinase receptor, angiogenesis |
| 78 | MCL1 | MCL1 Apoptosis Regulator, BCL2 Family Member | Apoptosis regulation, cell survival |
| 79 | CCR1 | C-C Motif Chemokine Receptor 1 | Chemokine receptor, immune cell migration |
| 80 | BCL2L1 | BCL2 Like 1 | Apoptosis regulation, cell survival |
| 81 | TRPV1 | Transient Receptor Potential Cation Channel Subfamily V Member 1 | Ion channel, pain sensation |
| 82 | PRKCQ | Protein Kinase C Theta | T cell activation, immune response |
| 83 | TK1 | Thymidine Kinase 1 | DNA synthesis, cell proliferation |
| 84 | PKM | Pyruvate Kinase M1/2 | Glycolysis, energy metabolism |
| 85 | PLA2G7 | Phospholipase A2 Group VII | Lipid metabolism, inflammation |
| 86 | SPHK1 | Sphingosine Kinase 1 | Sphingolipid metabolism, cell signaling |
| 87 | CCR5 | C-C Motif Chemokine Receptor 5 | Chemokine receptor, immune cell migration |
| 88 | CREBBP | CREB Binding Protein | Transcriptional coactivator, histone acetylation |
| 89 | TYMS | Thymidylate Synthetase | DNA synthesis, folate metabolism |
| 90 | MAPK8 | Mitogen-Activated Protein Kinase 8 | JNK signaling, stress response |
| 91 | HMOX1 | Heme Oxygenase 1 | Antioxidant, heme degradation |
| 92 | RXRA | Retinoid X Receptor Alpha | Nuclear receptor, retinoid signaling |
| 93 | RARB | Retinoic Acid Receptor Beta | Nuclear receptor, retinoid signaling |
| 94 | RARA | Retinoic Acid Receptor Alpha | Nuclear receptor, retinoid signaling |
| 95 | TP53 | Tumor Protein p53 | Transcription factor, tumor suppressor, apoptosis |
| 96 | ACE | Angiotensin I Converting Enzyme | Renin-angiotensin system, blood pressure regulation |
| 97 | KEAP1 | Kelch Like ECH Associated Protein 1 | Nrf2 pathway, oxidative stress response |
| 98 | HRAS | HRas Proto-Oncogene, GTPase | Ras/MAPK pathway, cell proliferation |
| 99 | KLK3 | Kallikrein Related Peptidase 3 | Protease, prostate-specific antigen |
| 100 | FGFR3 | Fibroblast Growth Factor Receptor 3 | Tyrosine kinase receptor, bone development |
| 101 | FGFR2 | Fibroblast Growth Factor Receptor 2 | Tyrosine kinase receptor, cell proliferation |
| 102 | CXCR2 | C-X-C Motif Chemokine Receptor 2 | Chemokine receptor, neutrophil migration |
| 103 | FLT1 | Fms Related Receptor Tyrosine Kinase 1 | VEGF receptor, angiogenesis |
| 104 | NQO2 | N-Ribosyldihydronicotinamide Quinone Reductase 2 | Quinone reductase, detoxification |

Supplementary Table S4. Predicted core hub targets of Songhe Guxue Formula for CTIT and their key biological relevance.

| **Rank** | **Hub Target** | **Key Functional Relevance in CTIT & Tumor Therapy** |
| --- | --- | --- |
| **1** | **TP53** | Master regulator of cell cycle and apoptosis; protects hematopoietic stem cells from therapy-induced DNA damage. |
| **2** | **AKT1** | Central kinase in PI3K-Akt survival pathway; crucial for cell proliferation and response to hematopoietic growth factors. |
| **3** | **IL6** | Pro-inflammatory cytokine linking therapy-induced inflammation to impaired hematopoietic recovery and niche regulation. |
| **4** | **STAT3** | Key transcription factor downstream of JAK-STAT signaling; mediates thrombopoietin (TPO)-driven megakaryocyte differentiation. |
| **5** | **JAK2** | Essential tyrosine kinase for TPO receptor signaling; directly initiates signals for platelet production. |
| **6** | **TNF** | Major mediator of systemic inflammation; excessive activity contributes to bone marrow suppression. |
| **7** | **VEGFA** | Promotes angiogenesis; critical for maintaining the integrity of bone marrow sinusoidal vessels where platelets are released. |
| **8** | **CASP3** | Executioner protease of apoptosis; its activation leads to programmed death of megakaryocytes and progenitors. |
| **9** | **EGFR** | Regulates epithelial cell growth and survival; involved in cell repair and proliferation across tissues. |
| **10** | **MAPK1/3** | Core components of MAPK pathway, regulating cell responses to stress, growth, and differentiation signals. |
| **11** | **SRC** | Non-receptor tyrosine kinase integrating multiple signals for cell adhesion, growth, and survival. |
| **12** | **HIF1A** | Master regulator of hypoxic response; influences bone marrow microenvironment and cell metabolism under stress. |
| **13** | **MYC** | Global transcription factor driving cell cycle progression and metabolic reprogramming. |
| **14** | **ESR1** | Nuclear hormone receptor with roles in cell proliferation and inflammatory modulation. |
| **15** | **BCL2** | Key anti-apoptotic protein that promotes survival of hematopoietic cells under cytotoxic stress. |

### Table 3. Molecular docking results of key active compounds from SHGXF against core therapeutic targets for CTIT.

| **Compound Name (ID)** | **Target**  **(Gene Symbol)** | **PDB ID** | **Binding Affinity**  **(kcal/mol)** | **Key Interactions*** |
| --- | --- | --- | --- | --- |
| Quercetin (MOL000098) | AKT1 | 1UNQ | -9.2 | H-bonds with LYS-158, GLU-228; π-π stacking with PHE-161 |
| β-Sitosterol (MOL000358) | TP53 | 2OCJ | -8.7 | H-bond with SER-121; Hydrophobic interactions with VAL-147, LEU-145 |
| Stigmasterol (MOL000449) | AKT1 | 1UNQ | -8.5 | H-bond with GLU-228; Hydrophobic interactions with VAL-164, ALA-177 |
| Kaempferol (MOL000422) | IL6 | 1ALU | -8.3 | H-bonds with ARG-104, GLU-105 |
| Hederagenin (MOL000296) | CASP3 | 1CP3 | -8.1 | H-bonds with ARG-207, HIS-181 |
| Quercetin (MOL000098) | TNF | 1TNF | -7.9 | H-bonds with TYR-151, SER-60 |
| Luteolin (MOL000006) | JAK2 | 6VGL | -7.7 | H-bond with LEU-932; π-cation interaction with ARG-980 |
| β-Sitosterol (MOL000358) | VEGFA | 3QTK | -7.5 | Hydrophobic interactions with CYS-61, PHE-36 |
| Formononetin (MOL000392) | EGFR | 1M17 | -7.4 | H-bond with THR-830; π-π stacking with PHE-832 |
| (+)-Catechin (MOL000492) | STAT3 | 6NJS | -7.2 | H-bonds with ARG-609, SER-613 |
